# Supplementary material
Source: publisher site journal article supplement (https://www.dovepress.com/article/512872)
Supplement: Supplementary file 1 [file get_supplementary_file.php]

**Supplementary Table 1** Diabetes Treatment Satisfaction Questionnaire Results assessed by patients

| **Items** | **Test Group**  **(N=52)a** | **Control Group**  **(N=60)a** | ***P* value** |
| --- | --- | --- | --- |
| Q1: Current treatment satisfaction | 5.25±1.31 | 4.83±1.73 | 0.159 |
| Q2: Convenience | 4.98±1.35 | 4.70±1.59 | 0.320 |
| Q3: Flexibility | 4.92±1.38 | 4.75±1.66 | 0.554 |
| Q4: Understanding | 4.77±1.35 | 4.68±1.55 | 0.757 |
| Q5: Willing to recommend | 4.50±1.81 | 4.15±1.91 | 0.324 |
| Q6: Satisfaction to continue | 4.12±2.52 | 3.13±2.63 | **0.047** |
| Q7: Unacceptable high glucose | 0.96±1.51 | 1.35±1.87 | 0.233 |
| Q8: Unacceptable low glucose | 0.38±1.07 | 0.42±1.06 | 0.874 |
| Total Score | 28.54±7.75 | 26.25±8.92 | 0.153 |

**Note**: Data are presented as mean ± Standard Deviation; The bold P-value indicates a significant difference (P<0.05). Total score was calculated as the sum of the scores for items 1-6. **a** This is follow-up data, so there is sample attrition.
